# Supplementary material
Source: PubMed Central journal article supplement (PMC2567923)
Supplement: 108.135814_3.pdf [file 108.135814_3.pdf]

**TABLE S3 Contact Energies of the URS Potential**

|                  | $N$   | $C^\alpha$ | $C$   | $O$   | $GC^\alpha$ | $C^\beta$ | $KN^\zeta$ | $KC^\delta$ | $DO^\delta$ | $RN^\eta$ | $NN^\delta$ | $RN^\varepsilon$ | $SO^\gamma$ | $HN^\varepsilon$ | $YC^\zeta$ | $FC^\zeta$ | $LC^\delta$ | $CS^\gamma$ |
|------------------|-------|------------|-------|-------|-------------|-----------|------------|-------------|-------------|-----------|-------------|------------------|-------------|------------------|------------|------------|-------------|-------------|
| $N$              | -0.46 | -0.63      | -0.60 | -0.79 | 1.18        | -1.02     | 1.12       | 2.03        | -0.19       | 0.25      | -0.13       | 1.08             | 0.08        | 0.59             | 0.64       | -1.13      | -0.34       | 2.55        |
| $C^\alpha$       | -0.63 | -0.80      | -0.73 | -0.87 | 1.04        | -1.28     | 0.71       | 1.63        | -0.29       | -0.16     | -0.35       | 0.61             | -0.12       | 0.23             | 0.34       | -1.46      | -0.76       | 2.47        |
| $C$              | -0.60 | -0.73      | -0.78 | -0.98 | 1.06        | -1.23     | 0.70       | 1.54        | -0.20       | -0.18     | -0.37       | 0.55             | -0.12       | 0.29             | 0.42       | -1.41      | -0.64       | 2.41        |
| $O$              | -0.79 | -0.87      | -0.98 | -1.21 | 0.95        | -1.38     | 0.46       | 1.32        | -0.40       | -0.34     | -0.54       | 0.28             | -0.26       | 0.07             | 0.28       | -1.56      | -0.79       | 2.31        |
| $GC^\alpha$      | 1.18  | 1.04       | 1.06  | 0.95  | 2.58        | 0.66      | 2.65       | 3.41        | 1.72        | 1.85      | 1.67        | 2.43             | 1.84        | 2.15             | 2.29       | 0.52       | 1.44        | 4.53        |
| $C^\beta$        | -1.02 | -1.28      | -1.23 | -1.38 | 0.66        | -1.78     | 0.37       | 1.26        | -0.79       | -0.49     | -0.75       | 0.20             | -0.54       | -0.14            | -0.19      | -2.01      | -1.28       | 2.09        |
| $KN^\zeta$       | 1.12  | 0.71       | 0.70  | 0.46  | 2.65        | 0.37      | 2.13       | 3.11        | 0.11        | 1.82      | 1.21        | 2.75             | 1.45        | 2.22             | 1.89       | 0.38       | 1.38        | 4.57        |
| $KC^\delta$      | 2.03  | 1.63       | 1.54  | 1.32  | 3.41        | 1.26      | 3.11       | 3.90        | 1.03        | 2.78      | 2.12        | 3.63             | 2.31        | 3.11             | 2.64       | 1.09       | 1.97        | 5.53        |
| $DO^\delta$      | -0.19 | -0.29      | -0.20 | -0.40 | 1.72        | -0.79     | 0.11       | 1.03        | -0.17       | -0.51     | 0.02        | 0.17             | 0.12        | 0.33             | 0.69       | -0.90      | 0.03        | 3.53        |
| $RN^\eta$        | 0.25  | -0.16      | -0.18 | -0.34 | 1.85        | -0.49     | 1.82       | 2.78        | -0.51       | 0.67      | 0.56        | 1.16             | 0.79        | 1.25             | 1.27       | -0.54      | 0.44        | 3.98        |
| $NN^\delta$      | -0.13 | -0.35      | -0.37 | -0.54 | 1.67        | -0.75     | 1.21       | 2.12        | 0.02        | 0.56      | -0.14       | 1.18             | 0.39        | 1.05             | 0.87       | -0.78      | 0.13        | 3.79        |
| $RN^\varepsilon$ | 1.08  | 0.61       | 0.55  | 0.28  | 2.43        | 0.20      | 2.75       | 3.63        | 0.17        | 1.16      | 1.18        | 1.72             | 1.41        | 1.69             | 1.63       | -0.04      | 0.90        | 4.40        |
| $SO^\gamma$      | 0.08  | -0.12      | -0.12 | -0.26 | 1.84        | -0.54     | 1.45       | 2.31        | 0.12        | 0.79      | 0.39        | 1.41             | 0.44        | 1.04             | 1.17       | -0.57      | 0.22        | 3.31        |
| $HN^\varepsilon$ | 0.59  | 0.23       | 0.29  | 0.07  | 2.15        | -0.14     | 2.22       | 3.11        | 0.33        | 1.25      | 1.05        | 1.69             | 1.04        | 0.84             | 1.50       | -0.17      | 0.58        | 3.51        |
| $YC^\zeta$       | 0.64  | 0.34       | 0.42  | 0.28  | 2.29        | -0.19     | 1.89       | 2.64        | 0.69        | 1.27      | 0.87        | 1.63             | 1.17        | 1.50             | 1.58       | -0.28      | 0.52        | 3.70        |
| $FC^\zeta$       | -1.13 | -1.46      | -1.41 | -1.56 | 0.52        | -2.01     | 0.38       | 1.09        | -0.90       | -0.54     | -0.78       | -0.04            | -0.57       | -0.17            | -0.28      | -2.33      | -1.59       | 2.18        |
| $LC^\delta$      | -0.34 | -0.76      | -0.64 | -0.79 | 1.44        | -1.28     | 1.38       | 1.97        | 0.03        | 0.44      | 0.13        | 0.90             | 0.22        | 0.58             | 0.52       | -1.59      | -1.19       | 2.81        |
| $CS^\gamma$      | 2.55  | 2.47       | 2.41  | 2.31  | 4.53        | 2.09      | 4.57       | 5.53        | 3.53        | 3.98      | 3.79        | 4.40             | 3.31        | 3.51             | 3.70       | 2.18       | 2.81        | 3.98        |
